# Supplementary material for: Exposure to the natural alkaloid Berberine affects cardiovascular system morphogenesis and functionality during zebrafish development
Source: PubMed Central journal article supplement (PMC7566475; doi:10.1038/s41598-020-73661-5), 2020-10-15
Supplement: 41598_2020_73661_MOESM1_ESM.pdf [file 41598_2020_73661_MOESM1_ESM.pdf]

**TITLE:**

**Exposure to the natural alkaloid Berberine affects cardiovascular system morphogenesis and functionality during zebrafish development**

DAVIDE MARTINI<sup>1#</sup>, CECILIA PUCCI<sup>1,2#,\$</sup>, CHIARA GABELLINI<sup>1</sup>, MARIO PELLEGRINO<sup>3</sup>  
and MASSIMILIANO ANDREAZZOLI<sup>\*,1,4</sup>

<sup>1</sup>*Cell and Developmental Biology Unit, Department of Biology, University of Pisa, Pisa, Italy*

<sup>2</sup>*Sant'Anna School of Advanced Studies, Pisa, Italy*

<sup>3</sup>*National Institute of Optics, National Research Council, Pisa, Italy*

<sup>4</sup>*Interdepartmental Research Center Nutrafood "Nutraceuticals and Food for Health", University of Pisa, Pisa, Italy*

# These authors equally contributed to this work.

\$Present address: Institute of Genomic Medicine, Catholic University, 00168 Rome, Italy.

\* Corresponding author:

[massimiliano.andreazzoli@unipi.it](mailto:massimiliano.andreazzoli@unipi.it)

*Cell and Developmental Biology Unit, Department of Biology, University of Pisa SS12 Abetone e Brennero, 56127 Pisa, Italy*

Tel. +39-050-2211485; FAX + 39-050-2211495

### Supplementary Table S1

#### Percentage of mortality at different timepoints and BRB concentrations

|                 | 24 h        | 48 h                           | 72 h                                | 96 h                           |
|-----------------|-------------|--------------------------------|-------------------------------------|--------------------------------|
| <b>control</b>  | 0.5 ± 0.5   | 1.3 ± 0.83                     | 2.28 ± 0.64                         | 2.75 ± 0.81                    |
| <b>50 mg/L</b>  | 0.98 ± 0.6  | 2.25 ± 0.99                    | 2.75 ± 0.81                         | 2.75 ± 0.81                    |
| <b>100 mg/L</b> | 0.98 ± 0.6  | 3.08 ± 1.32                    | 8.33 ± 1.21                         | (***)###<br>25.16 ± 5.06       |
| <b>200 mg/L</b> | 3.08 ± 1.54 | 5.65 ± 2.74                    | (***)###\$\$\$<br>42.13 ± 10.12     | (***)###\$\$\$<br>87.24 ± 4.95 |
| <b>400 mg/L</b> | 4.88 ± 1.85 | (***)###\$\$\$<br>36.74 ± 3.67 | (***)###\$\$\$(φφφ)<br>95.27 ± 2.36 | (***)###\$\$\$<br>100 ± 0.0    |

Data are cumulative and expressed as mean ± standard error of the mean (SEM) from 5 independent experiments, each with 40 larvae per experimental condition. One-way ANOVA followed by Tukey post hoc test. Statistical significance refers to the same exposure time, in the various experimental conditions. \*\*\* $p < 0.001$  vs control, ### $p < 0.001$  vs 50 mg/L, \$\$\$ $p < 0.001$  vs 100 mg/L, φφφ $p < 0.001$  vs 200 mg/L.

## Supplementary Table S2

### Percentage of embryos with pericardial edema at different timepoints and BRB concentrations

|                 | 24 h      | 48 h                           | 72 h                           | 96 h                             |
|-----------------|-----------|--------------------------------|--------------------------------|----------------------------------|
| <b>control</b>  | 0.00      | 0.192 ± 0.192                  | 0.5448 ± 0.29                  | 0.5448 ± 0.29                    |
| <b>50 mg/L</b>  | 0.00      | 1.34 ± 0.73                    | 3.947 ± 0.90                   | 6.38 ± 1.57                      |
| <b>100 mg/L</b> | 0.00      | (*)(#)<br>12.14 ± 2.64         | (***)(###)<br>26.67 ± 2.93     | (***)(###)<br>54.88 ± 5.01       |
| <b>200 mg/L</b> | 0.00      | (***)(###)<br>25.17 ± 8.65     | (***)(###)(\$)<br>40.81 ± 6.74 | (***)(###)<br>40.81 ± 6.74       |
| <b>400 mg/L</b> | 1.82±1.82 | (***)(###)(\$)<br>27.69 ± 7.27 | (***)(###)<br>27.69 ± 7.27     | (***)(#)(\$\$\$)<br>27.69 ± 7.27 |

Data are cumulative and expressed as mean ± SEM from 5 independent experiments, each with 40 larvae per experimental condition. One-way ANOVA followed by Tukey post hoc test. Statistical significance refers to the same exposure time, in the various experimental conditions:

\* $p < 0.05$  vs control, \*\*\* $p < 0.001$  vs control, # $p < 0.05$  vs 50 mg/L, ### $p < 0.001$  vs 50 mg/L, \$ $p < 0.05$  vs 100 mg/L, \$\$\$ $p < 0.001$  vs 100 mg/L.

**Supplementary Table S3****Sequences of primers used in qRT-PCR**

| <b>Gene name</b> |          | <b>Sequences</b>                 |
|------------------|----------|----------------------------------|
| cdh5             | <b>F</b> | 5' - TGG AATGAGTGT CAGTGCCC - 3' |
|                  | <b>R</b> | 5' - CAGCTGCTCATGGATTTCGC - 3'   |
| vegfaa           | <b>F</b> | 5' - AAAAGAGTGCGTGCAAGACC - 3'   |
|                  | <b>R</b> | 5' - GACGTTTCGTGTCTCTGTCG - 3'   |
| vegfab           | <b>F</b> | 5' - TGTTGGTGGAAATTCAGCAG - 3'   |
|                  | <b>R</b> | 5' - CACCCTGATGACGAAGAGGT - 3'   |
| phd3             | <b>F</b> | 5' - CCTGGAAATGGAGCTGGATA - 3'   |
|                  | <b>R</b> | 5' - CCGGTCAAATAAAGGCTCAA - 3'   |
| $\beta$ -actin   | <b>F</b> | 5' - CGAGCAGGAGATGGGAACC - 3'    |
|                  | <b>R</b> | 5' - CAACGGAAACGCTCATTGC - 3'    |
